# Supplementary material for: Risk of Lactic Acidosis in Hospitalized Diabetic Patients Prescribed Biguanides in Japan: A Retrospective Total-Population Cohort Study
Source: MDPI journal article supplement (doi:10.3390/ijerph20075300), 2023-03-29
Supplement: s1 [file s1]

**Supplementary Table S2**    The diagnosis codes of diabetes

| <b>diagnosis in Japanese</b> | <b>diagnosis in English</b>                             | <b>ICD-10 code</b> | <b>diagnosis code</b> |
|------------------------------|---------------------------------------------------------|--------------------|-----------------------|
| 1 型糖尿病                       | Type 1 diabetes mellitus                                | E10                | 2500014               |
| 不安定型糖尿病                      | Brittle diabetes                                        | E10                | 2500027               |
| 緩徐進行 1 型糖尿病                  | SPIDDM*                                                 | E10                | 8844022               |
| 1 型糖尿病性昏睡                    | Type 1 diabetic coma                                    | E100               | 8830030               |
| 1 型糖尿病・昏睡合併あり                | Type 1 diabetes mellitus with coma                      | E100               | 8841679               |
| 緩徐進行 1 型糖尿病・昏睡合併あり           | SPIDDM with coma                                        | E100               | 8844026               |
| 1 型糖尿病性低血糖性昏睡                | Hypoglycemia in the context of type 1 diabetes mellitus | E100               | 8845065               |
| 1 型糖尿病性ケトアシドーシス              | Diabetic ketoacidosis in type 1 diabetes mellitus       | E101               | 8830028               |
| 1 型糖尿病・ケトアシドーシス合併あり          | Type 1 diabetes mellitus with ketoacidosis              | E101               | 8841680               |
| 緩徐進行 1 型糖尿病・ケトアシドーシス合併あり     | SPIDDM with ketoacidosis                                | E101               | 8844025               |

|                  |                                                    |      |         |
|------------------|----------------------------------------------------|------|---------|
| 劇症 1 型糖尿病        | Fulminant type 1 diabetes mellitus                 | E101 | 8844045 |
| 1 型糖尿病性アシドーシス    | Diabetic ketoacidosis in type 1 diabetes mellitus  | E101 | 8845044 |
| 1 型糖尿病性アセトン血症    | Type 1 diabetic acetone hyperlipoproteinemia       | E101 | 8845045 |
| 1 型糖尿病性腎症        | Type 1 diabetic nephropathy                        | E102 | 8830031 |
| 1 型糖尿病・腎合併症あり    | Type 1 diabetes mellitus with diabetic nephropathy | E102 | 8841681 |
| 1 型糖尿病性腎症第 1 期   | Type 1 diabetic nephropathy phase 1                | E102 | 8843983 |
| 1 型糖尿病性腎症第 2 期   | Type 1 diabetic nephropathy phase 2                | E102 | 8843984 |
| 1 型糖尿病性腎症第 3 期   | Type 1 diabetic nephropathy phase 3                | E102 | 8843985 |
| 1 型糖尿病性腎症第 3 期 A | Type 1 diabetic nephropathy phase 3A               | E102 | 8843986 |
| 1 型糖尿病性腎症第 3 期 B | Type 1 diabetic nephropathy phase 3B               | E102 | 8843987 |
| 1 型糖尿病性腎症第 4 期   | Type 1 diabetic nephropathy phase 4                | E102 | 8843988 |

|                    |                                                     |      |         |
|--------------------|-----------------------------------------------------|------|---------|
| 1 型糖尿病性腎症第 5 期     | Type 1 diabetic nephropathy phase 5                 | E102 | 8843989 |
| 緩徐進行 1 型糖尿病・腎合併症あり | SPIDDM with nephropathy                             | E102 | 8844028 |
| 1 型糖尿病性腎硬化症        | Type 1 diabetic nephrosclerosis                     | E102 | 8845058 |
| 1 型糖尿病性腎不全         | Type 1 diabetic kidney failure                      | E102 | 8845059 |
| 1 型糖尿病性網膜症         | Type 1 diabetic retinopathy                         | E103 | 8830033 |
| 1 型糖尿病・眼合併症あり      | Type 1 diabetes mellitus with eye complication      | E103 | 8841682 |
| 1 型糖尿病性黄斑浮腫        | Type 1 diabetic macular edema                       | E103 | 8843982 |
| 緩徐進行 1 型糖尿病・眼合併症あり | SPIDDM with eye complication                        | E103 | 8844024 |
| 1 型糖尿病性白内障         | Type 1 diabetic cataracts                           | E103 | 8844346 |
| 増殖性糖尿病性網膜症・1 型糖尿病  | Proliferative diabetic retinopathy, type 1 diabetes | E103 | 8844536 |
| 1 型糖尿病黄斑症          | Type 1 diabetic macular disease                     | E103 | 8845043 |

|                       |                                                          |      |         |
|-----------------------|----------------------------------------------------------|------|---------|
| 1 型糖尿病性眼筋麻痺           | Type 1 diabetic eye muscle paralysis                     | E103 | 8845049 |
| 1 型糖尿病性虹彩炎            | Type 1 diabetic iritis                                   | E103 | 8845053 |
| 1 型糖尿病性中心性網膜症         | Type 1 diabetic central retinopathy                      | E103 | 8845064 |
| 1 型糖尿病性ニューロパチー        | Type 1 diabetic neuropathy                               | E104 | 8830032 |
| 1 型糖尿病・神経学的合併症あり      | Type 1 diabetes mellitus with neurological complications | E104 | 8841683 |
| 緩徐進行 1 型糖尿病・神経学的合併症あり | SPIDDM with neurological complications                   | E104 | 8844027 |
| 1 型糖尿病性筋萎縮症           | Type 1 diabetic muscular atrophy                         | E104 | 8845050 |
| 1 型糖尿病性神経因性膀胱         | Type 1 diabetic neuropathic bladder                      | E104 | 8845055 |
| 1 型糖尿病性神経痛            | Type 1 diabetic neuralgia                                | E104 | 8845056 |
| 1 型糖尿病性自律神経ニューロパチー    | Type 1 diabetic autonomic neuropathy                     | E104 | 8845057 |
| 1 型糖尿病性多発ニューロパチー      | Type 1 diabetic polyneuropathy                           | E104 | 8845062 |

|                       |                                                                    |      |         |
|-----------------------|--------------------------------------------------------------------|------|---------|
| 1 型糖尿病性単ニューロパチー       | Type 1 diabetic mononeuropathy                                     | E104 | 8845063 |
| 1 型糖尿病性末梢神経障害         | Type 1 diabetic peripheral neuropathy                              | E104 | 8845071 |
| 1 型糖尿病・末梢循環合併症あり      | Type 1 diabetes mellitus with peripheral circulation complications | E105 | 8841684 |
| 1 型糖尿病性壊疽             | Type 1 diabetic gangrene                                           | E105 | 8843105 |
| 緩徐進行 1 型糖尿病・末梢循環合併症あり | SPIDDM with peripheral circulation complications                   | E105 | 8844031 |
| 1 型糖尿病性潰瘍             | Type 1 diabetic ulcer                                              | E105 | 8845046 |
| 1 型糖尿病性血管障害           | Type 1 diabetic vascular disease                                   | E105 | 8845051 |
| 1 型糖尿病性動脈硬化症          | Type 1 diabetic atherosclerosis                                    | E105 | 8845066 |
| 1 型糖尿病性動脈閉塞症          | Type 1 diabetic arterial occlusion                                 | E105 | 8845067 |
| 1 型糖尿病性末梢血管症          | Type 1 diabetic peripheral vascular disease                        | E105 | 8845069 |
| 1 型糖尿病性末梢血管障害         | Type 1 diabetic peripheral vascular disease                        | E105 | 8845070 |

|                     |                                                      |      |         |
|---------------------|------------------------------------------------------|------|---------|
| 1 型糖尿病・関節合併症あり      | Type 1 diabetes mellitus with joint complications    | E106 | 8841685 |
| 1 型糖尿病・糖尿病性合併症あり    | Type 1 diabetes mellitus with diabetic complications | E106 | 8841686 |
| 緩徐進行 1 型糖尿病・関節合併症あり | SPIDDM with joint complications                      | E106 | 8844023 |
| 1 型糖尿病性水疱           | Type 1 diabetic blister                              | E106 | 8844626 |
| 1 型糖尿病性浮腫性硬化症       | Type 1 diabetic edematous sclerosis                  | E106 | 8844627 |
| 1 型糖尿病性肝障害          | Type 1 diabetic liver injury                         | E106 | 8845047 |
| 1 型糖尿病性関節症          | Type 1 diabetic arthropathy                          | E106 | 8845048 |
| 1 型糖尿病性高コレステロール血症   | Type 1 diabetic hypercholesterolemia                 | E106 | 8845052 |
| 1 型糖尿病性骨症           | Type 1 diabetic osteopathy                           | E106 | 8845054 |
| 1 型糖尿病性精神障害         | Type 1 diabetic mental disorder                      | E106 | 8845060 |
| 1 型糖尿病性そう痒症         | Type 1 diabetic pruritus                             | E106 | 8845061 |

|                         |                                                               |      |         |
|-------------------------|---------------------------------------------------------------|------|---------|
| 1 型糖尿病性皮膚障害             | Type 1 diabetic skin disorder                                 | E106 | 8845068 |
| 1 型糖尿病性胃腸症              | Type 1 diabetic gastroenteritis                               | E106 | 8845842 |
| 1 型糖尿病・多発糖尿病性合併症あり      | Type 1 diabetes mellitus with multiple diabetic complications | E107 | 8841687 |
| 緩徐進行 1 型糖尿病・多発糖尿病性合併症あり | SPIDDM with multiple diabetic complications                   | E107 | 8844029 |
| 1 型糖尿病・糖尿病性合併症なし        | Type 1 diabetes mellitus without diabetic complications       | E109 | 8841688 |
| 緩徐進行 1 型糖尿病・糖尿病性合併症なし   | SPIDDM without diabetic complications                         | E109 | 8844030 |
| インスリン抵抗性糖尿病             | Insulin resistant diabetes mellitus                           | E11  | 2500001 |
| 2 型糖尿病                  | Type 2 diabetes mellitus                                      | E11  | 2500015 |
| 安定型糖尿病                  | Stable diabetes mellitus                                      | E11  | 8830405 |
| 若年 2 型糖尿病               | Juvenile type 2 diabetes                                      | E11  | 8835244 |
| 2 型糖尿病性昏睡               | Type 2 diabetic coma                                          | E110 | 8830041 |

|                     |                                                              |      |         |
|---------------------|--------------------------------------------------------------|------|---------|
| 2 型糖尿病・昏睡合併あり       | Type 2 diabetes mellitus with coma                           | E110 | 8841689 |
| 2 型糖尿病性低血糖性昏睡       | Hypoglycemic coma in the context of type 2 diabetes mellitus | E110 | 8845094 |
| 2 型糖尿病性ケトアシドーシス     | Type 2 diabetic ketoacidosis                                 | E111 | 8830040 |
| 2 型糖尿病・ケトアシドーシス合併あり | Type 2 diabetes mellitus with ketoacidosis                   | E111 | 8841690 |
| 2 型糖尿病性アシドーシス       | Type 2 diabetic acidosis                                     | E111 | 8845073 |
| 2 型糖尿病性アセトン血症       | Type 2 diabetic acetone hyperlipoproteinemia                 | E111 | 8845074 |
| 2 型糖尿病性腎症           | Type 2 diabetic nephropathy                                  | E112 | 8830042 |
| 2 型糖尿病・腎合併症あり       | Type 2 diabetes mellitus with diabetic nephropathy           | E112 | 8841691 |
| 2 型糖尿病性腎症第 1 期      | Type 2 diabetic nephropathy phase 1                          | E112 | 8843991 |
| 2 型糖尿病性腎症第 2 期      | Type 2 diabetic nephropathy phase 2                          | E112 | 8843992 |
| 2 型糖尿病性腎症第 3 期      | Type 2 diabetic nephropathy phase 3                          | E112 | 8843993 |



|                   |                                                     |      |         |
|-------------------|-----------------------------------------------------|------|---------|
| 2 型糖尿病性腎症第 3 期 A  | Type 2 diabetic nephropathy phase 3A                | E112 | 8843994 |
| 2 型糖尿病性腎症第 3 期 B  | Type 2 diabetic nephropathy phase 3B                | E112 | 8843995 |
| 2 型糖尿病性腎症第 4 期    | Type 2 diabetic nephropathy phase 4                 | E112 | 8843996 |
| 2 型糖尿病性腎症第 5 期    | Type 2 diabetic nephropathy phase 5                 | E112 | 8843997 |
| 2 型糖尿病性腎硬化症       | Type 2 diabetic nephrosclerosis                     | E112 | 8845087 |
| 2 型糖尿病性腎不全        | Type 2 diabetic kidney failure                      | E112 | 8845088 |
| 2 型糖尿病性網膜症        | Type 2 diabetic retinopathy                         | E113 | 8830045 |
| 2 型糖尿病・眼合併症あり     | Type 2 diabetes mellitus with eye complications     | E113 | 8841692 |
| 2 型糖尿病性黄斑浮腫       | Type 2 diabetic macular edema                       | E113 | 8843990 |
| 2 型糖尿病性白内障        | Type 2 diabetic cataracts                           | E113 | 8844347 |
| 増殖性糖尿病性網膜症・2 型糖尿病 | Proliferative diabetic retinopathy, type 2 diabetes | E113 | 8844537 |

|                    |                                                          |      |         |
|--------------------|----------------------------------------------------------|------|---------|
| 2 型糖尿病黄斑症          | Type 2 diabetic macular disease                          | E113 | 8845072 |
| 2 型糖尿病性眼筋麻痺        | Type 2 diabetic eye muscle paralysis                     | E113 | 8845078 |
| 2 型糖尿病性虹彩炎         | Type 2 diabetic iritis                                   | E113 | 8845082 |
| 2 型糖尿病性中心性網膜症      | Type 2 diabetic central retinopathy                      | E113 | 8845093 |
| 2 型糖尿病性ニューロパチー     | Type 2 diabetic neuropathy                               | E114 | 8830043 |
| 2 型糖尿病性ミオパチー       | Type 2 diabetic myopathy                                 | E114 | 8830044 |
| 2 型糖尿病・神経学的合併症あり   | Type 2 diabetes mellitus with neurological complications | E114 | 8841693 |
| 2 型糖尿病性筋萎縮症        | Type 2 diabetic muscular atrophy                         | E114 | 8845079 |
| 2 型糖尿病性神経因性膀胱      | Type 2 diabetic neuropathic bladder                      | E114 | 8845084 |
| 2 型糖尿病性神経痛         | Type 2 diabetic neuralgia                                | E114 | 8845085 |
| 2 型糖尿病性自律神経ニューロパチー | Type 2 diabetic autonomic neuropathy                     | E114 | 8845086 |

|                  |                                                                    |      |         |
|------------------|--------------------------------------------------------------------|------|---------|
| 2 型糖尿病性多発ニューロパチー | Type 2 diabetic polyneuropathy                                     | E114 | 8845091 |
| 2 型糖尿病性単ニューロパチー  | Type 2 diabetic mononeuropathy                                     | E114 | 8845092 |
| 2 型糖尿病性末梢神経障害    | Type 2 diabetic peripheral neuropathy                              | E114 | 8845100 |
| 2 型糖尿病・末梢循環合併症あり | Type 2 diabetes mellitus with peripheral circulation complications | E115 | 8841694 |
| 2 型糖尿病性壊疽        | Type 2 diabetic gangrene                                           | E115 | 8843106 |
| 2 型糖尿病性潰瘍        | Type 2 diabetic ulcer                                              | E115 | 8845075 |
| 2 型糖尿病性血管障害      | Type 2 diabetic vascular disease                                   | E115 | 8845080 |
| 2 型糖尿病性動脈硬化症     | Type 2 diabetic atherosclerosis                                    | E115 | 8845095 |
| 2 型糖尿病性動脈閉塞症     | Type 2 diabetic arterial occlusion                                 | E115 | 8845096 |
| 2 型糖尿病性末梢血管症     | Type 2 diabetic peripheral vascular disease                        | E115 | 8845098 |
| 2 型糖尿病性末梢血管障害    | Type 2 diabetic peripheral vascular disease                        | E115 | 8845099 |

|                   |                                                      |      |         |
|-------------------|------------------------------------------------------|------|---------|
| 2 型糖尿病・関節合併症あり    | Type 2 diabetes mellitus with joint complications    | E116 | 8841695 |
| 2 型糖尿病・糖尿病性合併症あり  | Type 2 diabetes mellitus with diabetic complications | E116 | 8841696 |
| 2 型糖尿病性水疱         | Type 2 diabetic blister                              | E116 | 8844628 |
| 2 型糖尿病性浮腫性硬化症     | Type 2 diabetic edematous sclerosis                  | E116 | 8844629 |
| 2 型糖尿病性肝障害        | Type 2 diabetic liver injury                         | E116 | 8845076 |
| 2 型糖尿病性関節症        | Type 2 diabetic arthropathy                          | E116 | 8845077 |
| 2 型糖尿病性高コレステロール血症 | Type 2 diabetic hypercholesterolemia                 | E116 | 8845081 |
| 2 型糖尿病性骨症         | Type 2 diabetic osteopathy                           | E116 | 8845083 |
| 2 型糖尿病性精神障害       | Type 2 diabetic mental disorder                      | E116 | 8845089 |
| 2 型糖尿病性そう痒症       | Type 2 diabetic pruritus                             | E116 | 8845090 |
| 2 型糖尿病性皮膚障害       | Type 2 diabetic skin disorder                        | E116 | 8845097 |

|                    |                                                               |      |         |
|--------------------|---------------------------------------------------------------|------|---------|
| 2 型糖尿病性胃腸症         | Type 2 diabetic gastroenteritis                               | E116 | 8848108 |
| 2 型糖尿病・多発糖尿病性合併症あり | Type 2 diabetes mellitus with multiple diabetic complications | E117 | 8841697 |
| 2 型糖尿病・糖尿病性合併症なし   | Type 2 diabetes mellitus without diabetic complications       | E119 | 8841698 |
| 栄養不良関連糖尿病          | Malnutrition-related diabetes mellitus                        | E12  | 2500037 |
| 膵性糖尿病              | Pancreatic diabetes mellitus                                  | E13  | 2500024 |
| ステロイド糖尿病           | Steroid diabetes mellitus                                     | E13  | 2509003 |
| 二次性糖尿病             | Secondary diabetes mellitus                                   | E13  | 2509004 |
| ウイルス性糖尿病           | Viral diabetes mellitus                                       | E13  | 8830756 |
| 薬剤性糖尿病             | Drug-induced diabetes mellitus                                | E13  | 8840710 |
| ウイルス性糖尿病・昏睡合併あり    | Viral diabetes mellitus with coma                             | E130 | 8843122 |
| 膵性糖尿病・昏睡合併あり       | Pancreatic diabetes mellitus with coma                        | E130 | 8843377 |

|                       |                                                       |      |         |
|-----------------------|-------------------------------------------------------|------|---------|
| ステロイド糖尿病・昏睡合併あり       | Steroid diabetes mellitus with coma                   | E130 | 8843390 |
| 二次性糖尿病・昏睡合併あり         | Secondary diabetes mellitus with coma                 | E130 | 8843450 |
| 薬剤性糖尿病・昏睡合併あり         | Drug-induced diabetes mellitus with coma              | E130 | 8843621 |
| ウイルス性糖尿病・ケトアシドーシス合併あり | Viral diabetes mellitus with ketoacidosis             | E131 | 8843121 |
| 膵性糖尿病・ケトアシドーシス合併あり    | Pancreatic diabetes mellitus with ketoacidosis        | E131 | 8843376 |
| ステロイド糖尿病・ケトアシドーシス合併あり | Steroid diabetes mellitus with ketoacidosis           | E131 | 8843389 |
| 二次性糖尿病・ケトアシドーシス合併あり   | Secondary diabetes mellitus with ketoacidosis         | E131 | 8843449 |
| 薬剤性糖尿病・ケトアシドーシス合併あり   | Drug-induced diabetes mellitus with ketoacidosis      | E131 | 8843620 |
| ウイルス性糖尿病・腎合併症あり       | Viral diabetes mellitus with renal complications      | E132 | 8843124 |
| 膵性糖尿病・腎合併症あり          | Pancreatic diabetes mellitus with renal complications | E132 | 8843379 |
| ステロイド糖尿病・腎合併症あり       | Steroid diabetes mellitus with renal complications    | E132 | 8843392 |

|                    |                                                              |      |         |
|--------------------|--------------------------------------------------------------|------|---------|
| 二次性糖尿病・腎合併症あり      | Secondary diabetes mellitus with renal complications         | E132 | 8843452 |
| 薬剤性糖尿病・腎合併症あり      | Drug-induced diabetes mellitus with renal complications      | E132 | 8843623 |
| ウイルス性糖尿病・眼合併症あり    | Viral diabetes mellitus with eye complications               | E133 | 8843120 |
| 膵性糖尿病・眼合併症あり       | Pancreatic diabetes mellitus with eye complications          | E133 | 8843375 |
| ステロイド糖尿病・眼合併症あり    | Steroid diabetes mellitus with eye complications             | E133 | 8843388 |
| 二次性糖尿病・眼合併症あり      | Secondary diabetes mellitus with eye complications           | E133 | 8843448 |
| 薬剤性糖尿病・眼合併症あり      | Drug-induced diabetes mellitus with eye complications        | E133 | 8843619 |
| ウイルス性糖尿病・神経学的合併症あり | Viral diabetes mellitus with neurological complications      | E134 | 8843123 |
| 膵性糖尿病・神経学的合併症あり    | Pancreatic diabetes mellitus with neurological complications | E134 | 8843378 |
| ステロイド糖尿病・神経学的合併症あり | Steroid diabetes mellitus with neurological complications    | E134 | 8843391 |
| 二次性糖尿病・神経学的合併症あり   | Secondary diabetes mellitus with neurological complications  | E134 | 8843451 |

|                    |                                                                          |      |         |
|--------------------|--------------------------------------------------------------------------|------|---------|
| 薬剤性糖尿病・神経学的合併症あり   | Drug-induced diabetes mellitus with neurological complications           | E134 | 8843622 |
| ウイルス性糖尿病・末梢循環合併症あり | Viral diabetes mellitus with peripheral circulatory complications        | E135 | 8843128 |
| 膵性糖尿病・末梢循環合併症あり    | Pancreatic diabetes mellitus with peripheral circulatory complications   | E135 | 8843383 |
| ステロイド糖尿病・末梢循環合併症あり | Steroid diabetes mellitus with peripheral circulatory complications      | E135 | 8843396 |
| 二次性糖尿病・末梢循環合併症あり   | Secondary diabetes mellitus with peripheral circulatory complications    | E135 | 8843456 |
| 薬剤性糖尿病・末梢循環合併症あり   | Drug-induced diabetes mellitus with peripheral circulatory complications | E135 | 8843627 |
| ウイルス性糖尿病・糖尿病性合併症あり | Viral diabetes mellitus with diabetic complications                      | E136 | 8843126 |
| 膵性糖尿病・糖尿病性合併症あり    | Pancreatic diabetes mellitus with diabetic complications                 | E136 | 8843381 |
| ステロイド糖尿病・糖尿病性合併症あり | Steroid diabetes mellitus with diabetic complications                    | E136 | 8843394 |
| 二次性糖尿病・糖尿病性合併症あり   | Secondary diabetes mellitus with diabetic complications                  | E136 | 8843454 |
| 薬剤性糖尿病・糖尿病性合併症あり   | Drug-induced diabetes mellitus with diabetic complications               | E136 | 8843625 |



|                      |                                                                     |      |         |
|----------------------|---------------------------------------------------------------------|------|---------|
| ウイルス性糖尿病・多発糖尿病性合併症あり | Viral diabetes mellitus with multiple diabetic complications        | E137 | 8843125 |
| 膵性糖尿病・多発糖尿病性合併症あり    | Pancreatic diabetes mellitus with multiple diabetic complications   | E137 | 8843380 |
| ステロイド糖尿病・多発糖尿病性合併症あり | Steroid diabetes mellitus with multiple diabetic complications      | E137 | 8843393 |
| 二次性糖尿病・多発糖尿病性合併症あり   | Secondary diabetes mellitus with multiple diabetic complications    | E137 | 8843453 |
| 薬剤性糖尿病・多発糖尿病性合併症あり   | Drug-induced diabetes mellitus with multiple diabetic complications | E137 | 8843624 |
| ウイルス性糖尿病・糖尿病性合併症なし   | Viral diabetes mellitus without diabetic complications              | E139 | 8843127 |
| 膵性糖尿病・糖尿病性合併症なし      | Pancreatic diabetes mellitus without diabetic complications         | E139 | 8843382 |
| ステロイド糖尿病・糖尿病性合併症なし   | Steroid diabetes mellitus without diabetic complications            | E139 | 8843395 |
| 二次性糖尿病・糖尿病性合併症なし     | Secondary diabetes mellitus without diabetic complications          | E139 | 8843455 |
| 薬剤性糖尿病・糖尿病性合併症なし     | Drug-induced diabetes mellitus without diabetic complications       | E139 | 8843626 |
| 糖尿病                  | Diabetes mellitus                                                   | E14  | 2500013 |

|              |                                                       |      |         |
|--------------|-------------------------------------------------------|------|---------|
| 糖尿病合併症       | Diabetic complications                                | E14  | 2507028 |
| 糖尿病性昏睡       | Diabetic coma                                         | E140 | 2502006 |
| 糖尿病性低血糖性昏睡   | Hypoglycemic coma in the context of diabetes mellitus | E140 | 8838076 |
| 糖尿病性アシドーシス   | Diabetic acidosis                                     | E141 | 2501002 |
| 糖尿病性アセトン血症   | Diabetic acetonemia                                   | E141 | 2501003 |
| 糖尿病性ケトアシドーシス | Diabetic ketoacidosis                                 | E141 | 2501005 |
| 糖尿病性腎症       | Diabetic nephropathy                                  | E142 | 2503005 |
| 糖尿病性腎不全      | Diabetic renal failure                                | E142 | 2503007 |
| 糖尿病性腎硬化症     | Diabetic nephrosclerosis                              | E142 | 8838071 |
| 糖尿病性虹彩炎      | Diabetic iritis                                       | E143 | 2504004 |
| 糖尿病性中心性網膜症   | Diabetic central retinopathy                          | E143 | 2504005 |

|                 |                                    |      |         |
|-----------------|------------------------------------|------|---------|
| 糖尿病性白内障         | Diabetic cataract                  | E143 | 2504006 |
| 増殖性糖尿病性網膜症      | Proliferative diabetic retinopathy | E143 | 2504010 |
| 糖尿病黄斑症          | Diabetic maculopathy               | E143 | 2504012 |
| 糖尿病網膜症          | Diabetic retinopathy               | E143 | 2504013 |
| 糖尿病性眼筋麻痺        | Diabetic ophthalmoplegia           | E143 | 8838065 |
| 糖尿病黄斑浮腫         | Diabetic macular edema             | E143 | 8844089 |
| 糖尿病性神経痛         | Diabetic neuralgia                 | E144 | 2505011 |
| 糖尿病性末梢神経障害      | Diabetic peripheral neuropathy     | E144 | 2505018 |
| 糖尿病性筋萎縮症        | Diabetic muscular atrophy          | E144 | 2505021 |
| 糖尿病性神経因性膀胱      | Diabetic neuropathic bladder       | E144 | 8838069 |
| 糖尿病性自律神経ニューロパシー | Diabetic autonomic neuropathy      | E144 | 8838070 |

|               |                                      |      |         |
|---------------|--------------------------------------|------|---------|
| 糖尿病性多発ニューロパチー | Diabetic polyneuropathy              | E144 | 8838074 |
| 糖尿病性単ニューロパチー  | Diabetic mononeuropathy              | E144 | 8838075 |
| 糖尿病性ニューロパチー   | Diabetic neuropathy                  | E144 | 8838078 |
| 糖尿病足病変        | Diabetic foot lesion                 | E144 | 8848634 |
| 糖尿病性神経障害性疼痛   | Diabetic neuropathic pain            | E144 | 8848768 |
| 糖尿病性壊疽        | Diabetic gangrene                    | E145 | 2506006 |
| 糖尿病性動脈閉塞症     | Diabetic arterial occlusion          | E145 | 2506011 |
| 糖尿病性潰瘍        | Diabetic ulcer                       | E145 | 8838063 |
| 糖尿病性血管障害      | Diabetic angiopathy                  | E145 | 8838066 |
| 糖尿病性動脈硬化症     | Diabetic arteriosclerosis            | E145 | 8838077 |
| 糖尿病性末梢血管症     | Diabetic peripheral vascular disease | E145 | 8838079 |

|                |                                      |      |         |
|----------------|--------------------------------------|------|---------|
| 糖尿病性末梢血管障害     | Diabetic peripheral vascular disease | E145 | 8838080 |
| 糖尿病足壊疽         | Diabetic foot gangrene               | E145 | 8848632 |
| 糖尿病足潰瘍         | Diabetic foot ulcer                  | E145 | 8848633 |
| 糖尿病性関節症        | Diabetic arthropathy                 | E146 | 2507025 |
| 糖尿病性皮膚障害       | Diabetic skin disorders              | E146 | 2507029 |
| 糖尿病性肝障害        | Diabetic liver injury                | E146 | 8838064 |
| 糖尿病性高コレステロール血症 | Diabetic hypercholesterolemia        | E146 | 8838067 |
| 糖尿病性骨症         | Diabetic osteopathy                  | E146 | 8838068 |
| 糖尿病性精神障害       | Diabetic mental disorder             | E146 | 8838072 |
| 糖尿病性そう痒症       | Diabetic pruritus                    | E146 | 8838073 |
| 糖尿病性水疱         | Diabetic blister                     | E146 | 8844652 |

|               |                                                           |      |         |
|---------------|-----------------------------------------------------------|------|---------|
| 糖尿病性浮腫性硬化症    | Diabetic edematous sclerosis                              | E146 | 8844653 |
| 高血糖高浸透圧症候群    | Hyperglycemia hyperosmolarity syndrome                    | E146 | 8845128 |
| 糖尿病・糖尿病性合併症なし | Diabetes mellitus without diabetic complications          | E149 | 8843439 |
| 非糖尿病性低血糖性昏睡   | Hypoglycemic coma not in the context of diabetes mellitus | E15  | 8839324 |
| 果糖尿症          | Levulosuria                                               | E741 | 8831401 |
| 本態性果糖尿症       | Essential levulosuria                                     | E741 | 8840104 |
| 良性果糖尿症        | Benign levulosuria                                        | E741 | 8841021 |
| 腎性糖尿          | Renal glycosuria                                          | E748 | 2714002 |
| 青銅性糖尿病        | Bronze diabetes mellitus                                  | E831 | 8835941 |
| 膵全摘後二次性糖尿病    | Secondary diabetes after pancreatectomy                   | E891 | 8835685 |
| 1 型糖尿病合併妊娠    | Pregnancy with type 1 diabetes                            | O240 | 8830029 |

|             |                                         |      |         |
|-------------|-----------------------------------------|------|---------|
| 2 型糖尿病合併妊娠  | Pregnancy with type 2 diabetes          | O241 | 8830039 |
| 妊娠糖尿病       | Pregnancy diabetes mellitus             | O244 | 6489003 |
| 妊娠中の糖尿病     | Overt diabetes in pregnancy             | O249 | 8838621 |
| 妊娠中の耐糖能低下   | Impaired glucose tolerance in pregnancy | O998 | 8838619 |
| 妊娠糖尿病母体児症候群 | Gestational diabetes maternal syndrome  | P700 | 8838633 |
| 糖尿病母体児      | Diabetes maternal infant                | P701 | 8838081 |
| 新生児一過性糖尿病   | Neonatal transient diabetes mellitus    | P702 | 7751001 |
| 新生児糖尿病      | Neonatal diabetes mellitus              | P702 | 7751002 |
| 新生児一過性高血糖症  | Neonatal transient hyperglycemia        | P708 | 8844233 |
| 境界型糖尿病      | Borderline type diabetes mellitus       | R730 | 2500031 |
| 耐糖能異常       | Impaired glucose tolerance              | R730 | 2713009 |

|         |                             |      |         |
|---------|-----------------------------|------|---------|
| 化学的糖尿病  | Chemical diabetes mellitus  | R730 | 8831132 |
| 潜在性糖尿病  | Latent diabetes mellitus    | R730 | 8836104 |
| 前糖尿病    | Pre-diabetes mellitus       | R730 | 8836563 |
| 高血糖症    | Hyperglycemia               | R739 | 8833419 |
| 一過性糖尿   | Transient diabetes mellitus | R81  | 7915002 |
| 五炭糖尿症   | L-Xylulosuria               | R81  | 7915003 |
| 高血糖性糖尿  | Hypoglycemic glycosuria     | R81  | 8833420 |
| 食事性糖尿   | Dietary glycosuria          | R81  | 8834843 |
| 情動性糖尿   | Emotional glycosuria        | R81  | 8835464 |
| 正常血糖性糖尿 | Euglycemic glycosuria       | R81  | 8835871 |
| 糖尿      | Glycosuria                  | R81  | 8838062 |

---

\* SPIDDM means “Slowly Progressive Insulin-Dependent Diabetes Mellitus”
